# Supplementary material
Source: publisher figshare collection journal article supplement (https://acs.figshare.com/ndownloader/files/4583083)
Supplement: Supplementary file 1 [file 4583083]

## **Supporting Information**

### **Adsorption and Simultaneous Dechlorination of PCBs on GAC/Fe/Pd: Mechanistic Aspects and Reactive Capping Barrier Concept**

HYEOK CHOI<sup>1</sup>, SHIRISH AGARWAL<sup>2</sup>, SOUHAIL R. AL-ABED<sup>\*,1</sup>

<sup>1</sup> *National Risk Management Research Laboratory, U.S. Environmental Protection Agency, 26 W. Martin Luther King Dr., Cincinnati, OH 45268, USA*

<sup>2</sup> *Pegasus Technical Services, Inc, 46 East Hollister Street, Cincinnati, OH 45221, USA*

\*Corresponding author phone: (513) 569-7849; e-mail: al-abad.souhail@epa.gov.

## **Environmental Science and Technology**

August 6, 2008

### **Contents:**

- ❖ FIGURE S1. ESEM image of GAC impregnated with Fe/Pd bimetallic nanoparticles.
- ❖ FIGURE S2. Evolution of adsorption of 2-ClBP to AC phase, transformation of the adsorbed 2-ClBP to BP, and partitioning of the formed BP between liquid and AC phases over time in (a) GAC and (b) RAC at the highest loading of 100 g/L.
- ❖ FIGURE S3. Evolution of 2-ClBP and BP concentration in liquid phase in the presence of GAC mixed with individual 2-ClBP and BP.

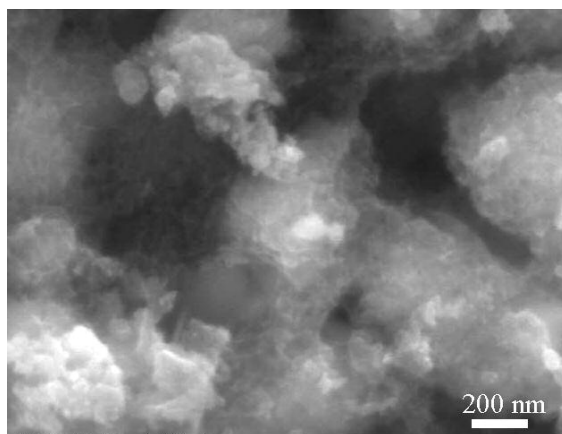

**FIGURE S1. ESEM image of GAC impregnated with Fe/Pd bimetallic nanoparticles.**  
**The porous structure of GAC was covered by the Fe/Pd matrix.**

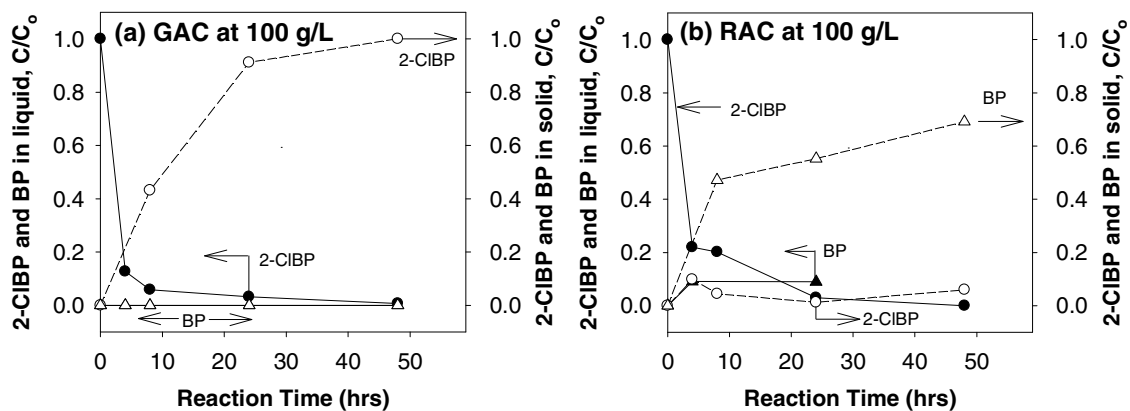

**FIGURE S2. Evolution of adsorption of 2-CIBP to AC phase, transformation of the adsorbed 2-CIBP to BP, and partitioning of the formed BP between liquid and AC phases over time in (a) GAC and (b) RAC at the highest loading of 100 g/L.**

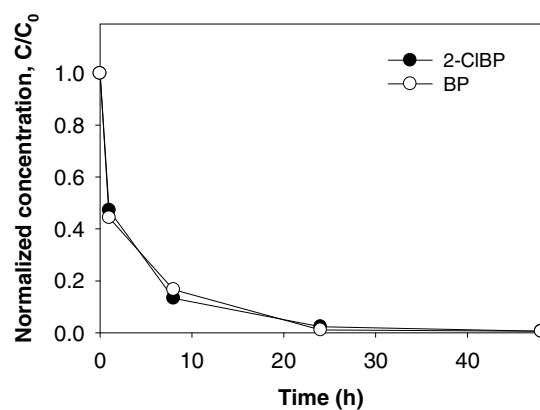

**FIGURE S3. Evolution of 2-CIBP and BP concentration in liquid phase in the presence of GAC mixed with individual 2-CIBP and BP. This shows no considerable preference for adsorption between 2-CIBP and BP to GAC.**
